# Supplementary material
Source: Research Square preprint supplement (doi:10.21203/rs.3.rs-9375944/v1)

## Supplementary File 2

Fig. 3: Molecular identification of *Staphylococcus* spp. via 16S rRNA gene PCR (756 bp). Lane M: 100 bp DNA ladder; Lanes 2–8 and 10–14: Positive isolates; Lane P: Positive control; Lane N: Negative control.

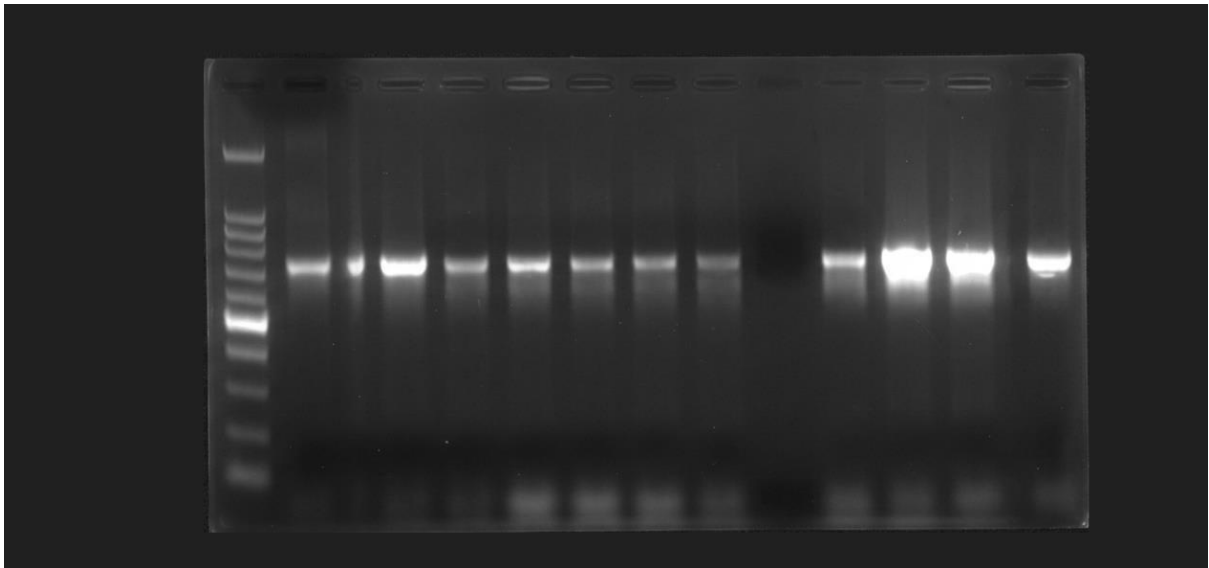

Fig. 4: Confirmation of *S. aureus* via *nuc* gene PCR (279 bp). Lane M: 100 bp DNA ladder; Lanes 1–14: Positive isolates; Lane P: Positive control; Lane N: Negative control.

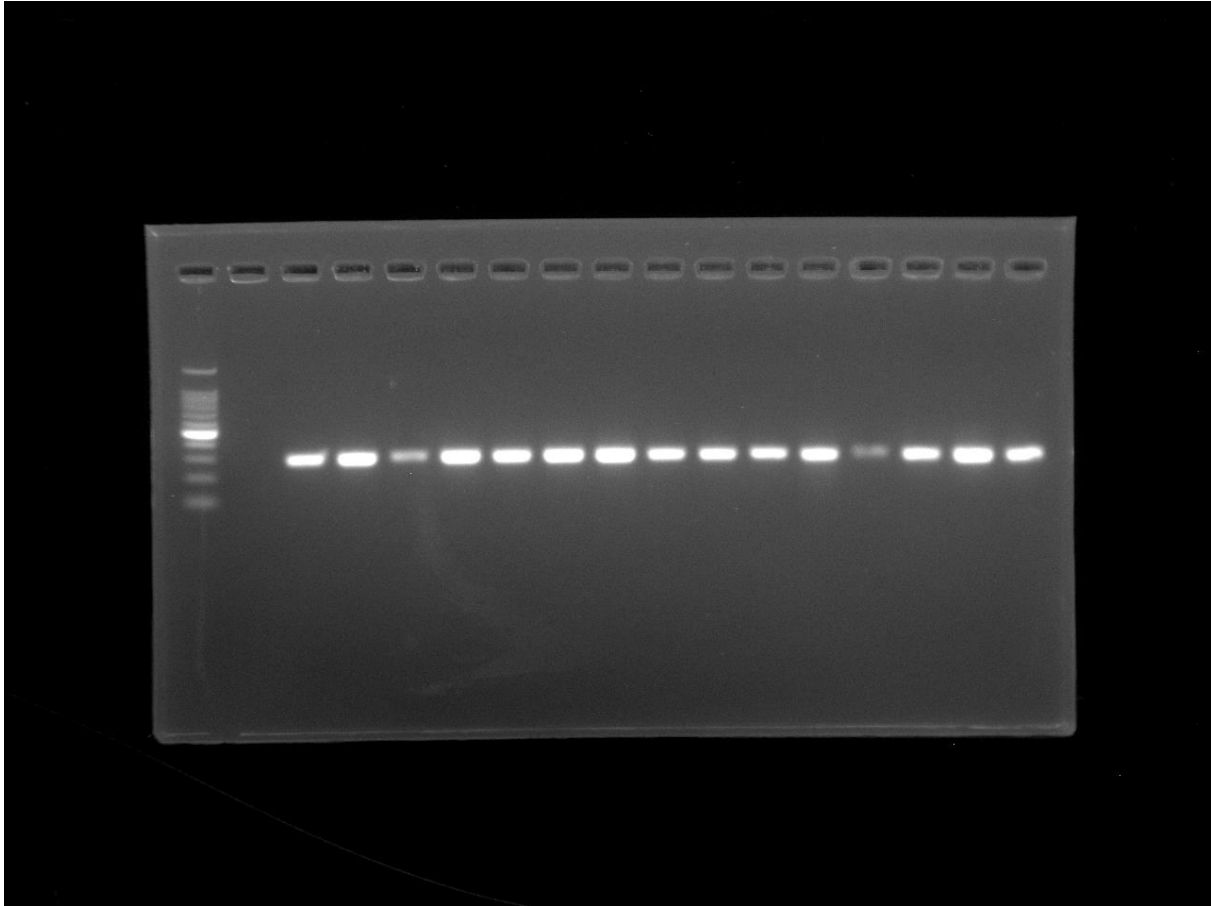

Fig. 5: Detection of MRSA via *mecA* gene PCR (147 bp). Lane M: 100 bp DNA ladder; Lanes 1–5: Positive isolates; Lane P: Positive control; Lane N: Negative control.

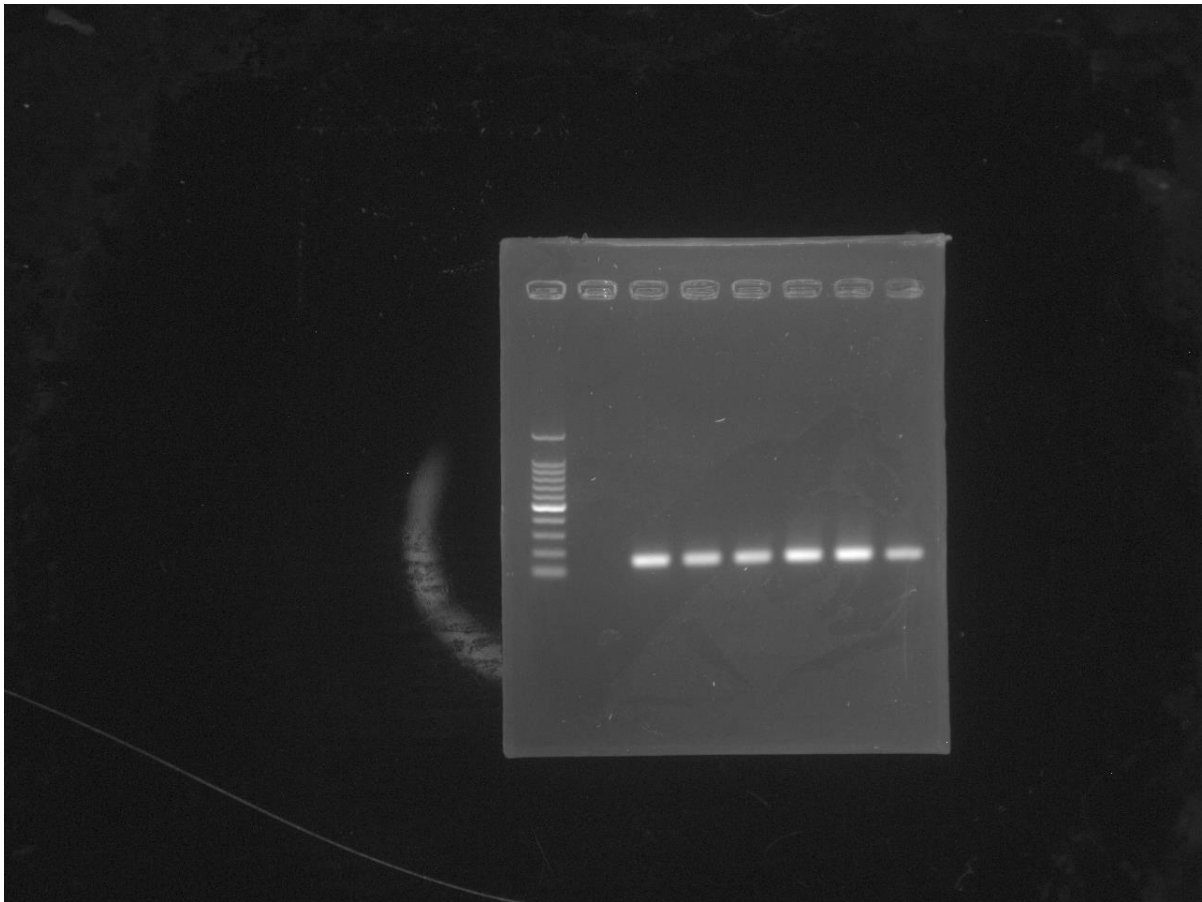

Supplement: Supplementary file 1 [file 295733f6337dce278854fd7f.pdf]
