# Supplementary material
Source: Research Square preprint supplement (doi:10.21203/rs.3.rs-9375944/v1)
Supplement: Supplementary file 2 [file 7bca99b003a6d153459d6f59.pdf]

### **Informed Verbal and Written Consent for Animal Owners**

I am Dr. Himangsu Sarker, Research Associate, Department of Medicine, Faculty of Veterinary Science, Bangladesh Agricultural University, Mymensingh-2022 conducting research titled **“Investigation on genetic relatedness and transmission of MRSA between companion animals and human patients in selective areas of Bangladesh”**. I am collecting data about your disease, which will be confidential. This information will be used only for research and public health purposes. Your valuable input will help to improve the management of risk factors for MRSA transmission among humans in Bangladesh. The interview may take around 10 minutes.

Do you agree to participate in the interview? Yes / No

If yes, put signature and date here.....

After signature, proceed with the interview.

If not, give Thanks to him or her and leave.

Serial No.... Date:.....

#### **Name and address of the**

Pets Owner:..... Age:..... Gender:.....

Occupation:.....Vill/Ward:.....Union:.....

Upazilla:..... Dist:.....

**Phone number:.....**

### Questionnaires for Animal Owners

|            |                                                                                        |         |                |         |      |
|------------|----------------------------------------------------------------------------------------|---------|----------------|---------|------|
| Serial No. |                                                                                        |         |                |         |      |
| 1          | Education:                                                                             | Primary | S.Sc./<br>H.Sc | Univer. | NFE  |
| 2          | Frequency of daily contact with pets/day:                                              | 1       | 2              | 3       | More |
| 3          | Duration of contact with pets/day:                                                     | 1h      | 2h             | 3h      | More |
| 4          | Do you eat in the animal shed?                                                         | Yes     | No             |         |      |
| 5          | Have you taken any antibiotics or medications in the last few weeks, months, or years? | Yes     | No             |         |      |
| 6          | What kinds of antibiotics or medicines were used, and what was their brand name?       |         |                |         |      |
| 7.         | Are animals allowed to move freely in the house                                        |         |                |         |      |
| 8          | Are animals allowed to lick human faces?                                               | Yes     | No             | 8       |      |
| 9          | Are animals allowed to sleep where humans sleep?                                       | Yes     | No             |         |      |
| 10         | What is the sanitary condition of the home?                                            | Good    | Poor           |         |      |
| 11         | Is the practice of personal hygiene satisfactory?                                      | Yes     | No             |         |      |

|    |                                                                                                                                                 |       |      |      |  |
|----|-------------------------------------------------------------------------------------------------------------------------------------------------|-------|------|------|--|
| 12 | Where do you keep pets?                                                                                                                         | Floor | Cage | Home |  |
| 13 | Do you share personal items such as towels, clothes, or razors with others?                                                                     | Yes   | NO   |      |  |
| 14 | Do you have any skin infections, wounds, or other bodily injuries?                                                                              | Yes   | NO   |      |  |
| 15 | Have you had any surgical procedures performed recently/previously?                                                                             | Yes   | NO   |      |  |
| 16 | Have you been in the hospital for an extended period of time? [> 7 days]                                                                        | Yes   | NO   |      |  |
| 17 | Did you receive zoonotic disease vaccines like rabies?                                                                                          | Yes   | NO   |      |  |
| 18 | Do you have recent contact with the infected area or with contaminated items, such as bedding, food or water bowls, or a toy with saliva on it? | Yes   | NO   |      |  |
| 19 | Do you wash and sanitize your hands after touching infected or sick animals?                                                                    | Yes   | NO   |      |  |
| 20 | Did you visit a high-risk environment, such as a nursing home or hospital?                                                                      | Yes   | NO   |      |  |
| 21 | Do you live with health care workers?                                                                                                           | Yes   | NO   |      |  |

**Thank you for your kind cooperation**

**Signature of the researcher & Date**

**Signature of the data collector & Date**

**Questionnaires for Pet Animals**

Case No.....

Date:.....

Patient information:-

Species..... Breed..... Age..... Sex.....  
Color.....Weight.....

Pregnancy status.....

Owners' name:..... Address: Ward/Vill.:  
:.....

Union/Municipality:.....Upazila:.....District:.....  
.....

Phone number:

Complaints

:.....

Total animals:

Others animals:

### Questionnaires for Pet Animals

|    |                                                                      |           |                                    |           |            |
|----|----------------------------------------------------------------------|-----------|------------------------------------|-----------|------------|
| 1  | Has the animal been affected by disease?                             | Yes       | No                                 |           |            |
| 2  | The types of disease                                                 | Bacterial | Viral                              | Parasitic | Open wound |
| 3  | What was the duration of the illness?                                | 7 days    | 15 days                            | 21 days   | 30 days    |
| 4  | What were the observed clinical signs?                               |           |                                    |           |            |
| 5  | Has the animal received any treatment?                               | Yes       | No                                 |           |            |
| 6  | Has the animal received any antibiotics?                             | Yes       | No                                 |           |            |
| 7  | What antibiotics were used, and what were their names?               |           |                                    |           |            |
| 8  | Who has treated the patients?                                        | Doctor    | Unskilled veterinary practitioners | Self      | Peer       |
| 9  | What was the duration of the antibiotic treatment?                   | 3 days    | 5 days                             | 7 days    | More       |
| 10 | Was there any postoperative incisional infection or wound infection? | Yes       | No                                 |           |            |
| 11 | Was there any incorrect prescription or prescribing practice?        | Yes       | No                                 |           |            |

|    |                                                                   |                                    |          |                |          |
|----|-------------------------------------------------------------------|------------------------------------|----------|----------------|----------|
| 12 | Who was responsible for incorrect prescription writing?           | Unskilled veterinary practitioners | Dealer   | Another farmer |          |
| 13 | Are there any companion animals living near humans?               | High                               | Medium   | Low            | No       |
| 14 | Has the animal received any vaccines?                             | Yes                                | No       |                |          |
| 15 | What were the types of used anthelmintics?                        | Alben.                             | Ivermec. | Fenben         | Others   |
| 16 | What is the frequency of cleaning the floor, feeder, and drinker? | Daily                              | Weekly   | Monthly        | Not done |

Thank you for your kind cooperation

**Signature of the researcher & Date**

**Signature of the data collector & Date**

### Informed Verbal and Written Consent

I am Dr. Himangsu Sarker, Research Associate, Department of Medicine, Faculty of Veterinary Science, Bangladesh Agricultural University, Mymensingh-2022 conducting research titled **“Investigation on genetic relatedness and transmission of MRSA between companion animals and human patients in selective areas of Bangladesh”**. I am collecting data about your disease, which will be confidential. This information will be used only for research and public health purposes. Your valuable input will contribute to improving the management of risk factors for the transmission of MRSA among humans in Bangladesh. The interview may take around 10 minutes.

Do you agree to participate in the interview? Yes / No

If yes, put signature and date here.....

After signature, proceed with the interview.

If not, give Thanks to him or her and leave.

Serial No.....

Date.....

Name and address of the

Veterinary personnel ..... Age..... Gender.....

Occupation.....Vill/Ward.....Union.....

Upazilla..... Dist.....

Mobile No.....

### Questionnaires for Veterinary Personnel

|         |                                                                                        |         |             |            |      |
|---------|----------------------------------------------------------------------------------------|---------|-------------|------------|------|
| SL. No. |                                                                                        |         |             |            |      |
| 1       | Education:                                                                             | Primary | S.S.C./H.Sc | University | NFE  |
| 2       | Frequency of daily contact with pets/day:                                              | 1       | 2           | 3          | More |
| 3       | Duration of contact with pets/day:                                                     | 1h      | 2h          | 3h         | More |
| 4       | Have you taken any antibiotics or medications in the last few weeks, months, or years? | Yes     | No          |            |      |
| 5       | What kinds of antibiotics or medicines were used, and what was their brand name?       | Yes     | No          |            |      |
| 6       | Do you have close contact with pets every day?                                         | Yes     | No          |            |      |
| 7       | What is the sanitary condition of the veterinary hospital?                             | Good    | Poor        |            |      |
| 8       | Is the practice of personal hygiene satisfactory?                                      | Yes     | No          |            |      |
| 9       | Do you have any skin infections, wounds, or other bodily injuries?                     | Yes     | NO          |            |      |
| 10      | Have you had any surgical procedures performed recently/previously?                    | Yes     | NO          |            |      |
| 11      | Have you been in the hospital for an extended period of time? [> 7 days]               | Yes     | NO          |            |      |

|    |                                                                                                                                                 |     |    |  |  |
|----|-------------------------------------------------------------------------------------------------------------------------------------------------|-----|----|--|--|
| 12 | Did you receive zoonotic disease vaccines like rabies?                                                                                          | Yes | NO |  |  |
| 13 | Do you have recent contact with the infected area or with contaminated items, such as bedding, food or water bowls, or a toy with saliva on it? | Yes | NO |  |  |
| 14 | Do you wash and sanitize your hands after touching infected or sick animals?                                                                    | Yes | NO |  |  |
| 15 | Have you visited a high-risk environment, such as a nursing home or hospital, for treatment purposes?                                           | Yes | NO |  |  |
| 16 | Do you use hand gloves during treatment and management of your pets?                                                                            | Yes | NO |  |  |

Thank you for your kind cooperation

**Signature of the researcher & Date**

**Signature of the data collector & Date**
